# Supplementary material for: Human DHEA sulfation requires direct interaction between PAPS synthase 2 and DHEA sulfotransferase SULT2A1
Source: PubMed Central journal article supplement (PMC6016456; doi:10.1074/jbc.ra118.002248), 2018-05-09
Supplement: supp_RA118.002248_135768_1_supp_128342_p7svrj.pdf [file supp_RA118.002248_135768_1_supp_128342_p7svrj.pdf]

## **SUPPORTING INFORMATION**

for the article

**Human DHEA sulfation requires direct interaction between PAPS synthase 2 and DHEA sulfotransferase SULT2A1**

by

Jonathan W Mueller, Jan Idkowiak, Tarsis F. Gesteira, Cecilia Vallet, Rebecca Hardman,  
Johannes van den Boom, Vivek Dhir, Shirley K. Knauer, Edina Rosta, Wiebke Arlt

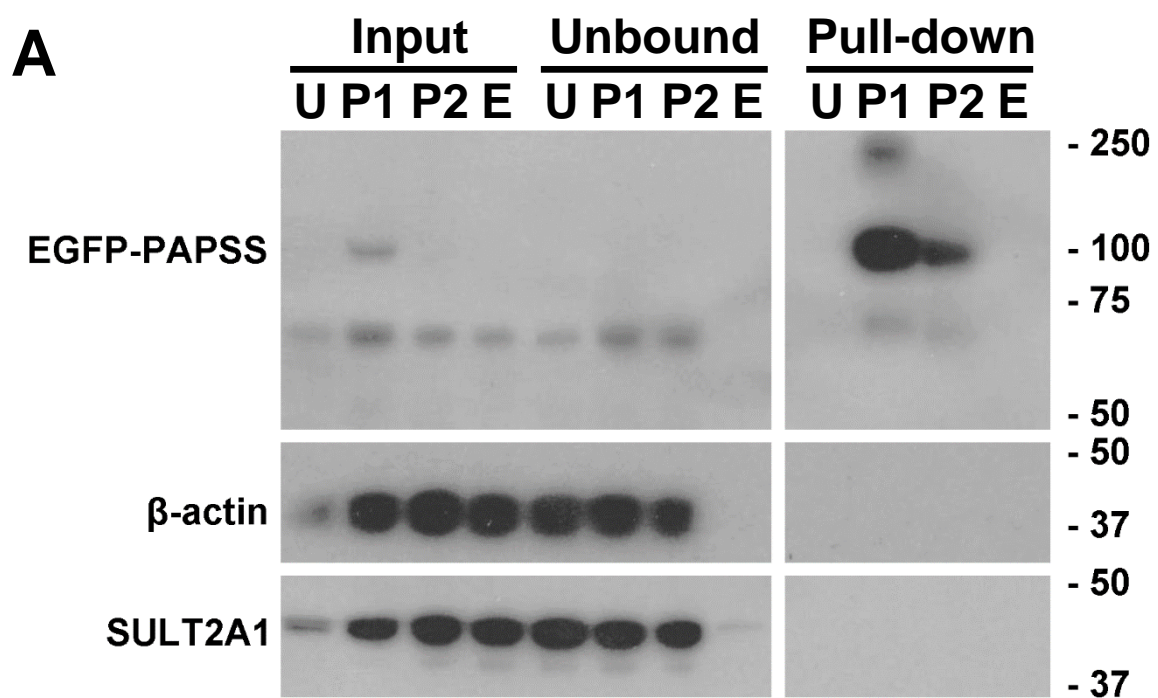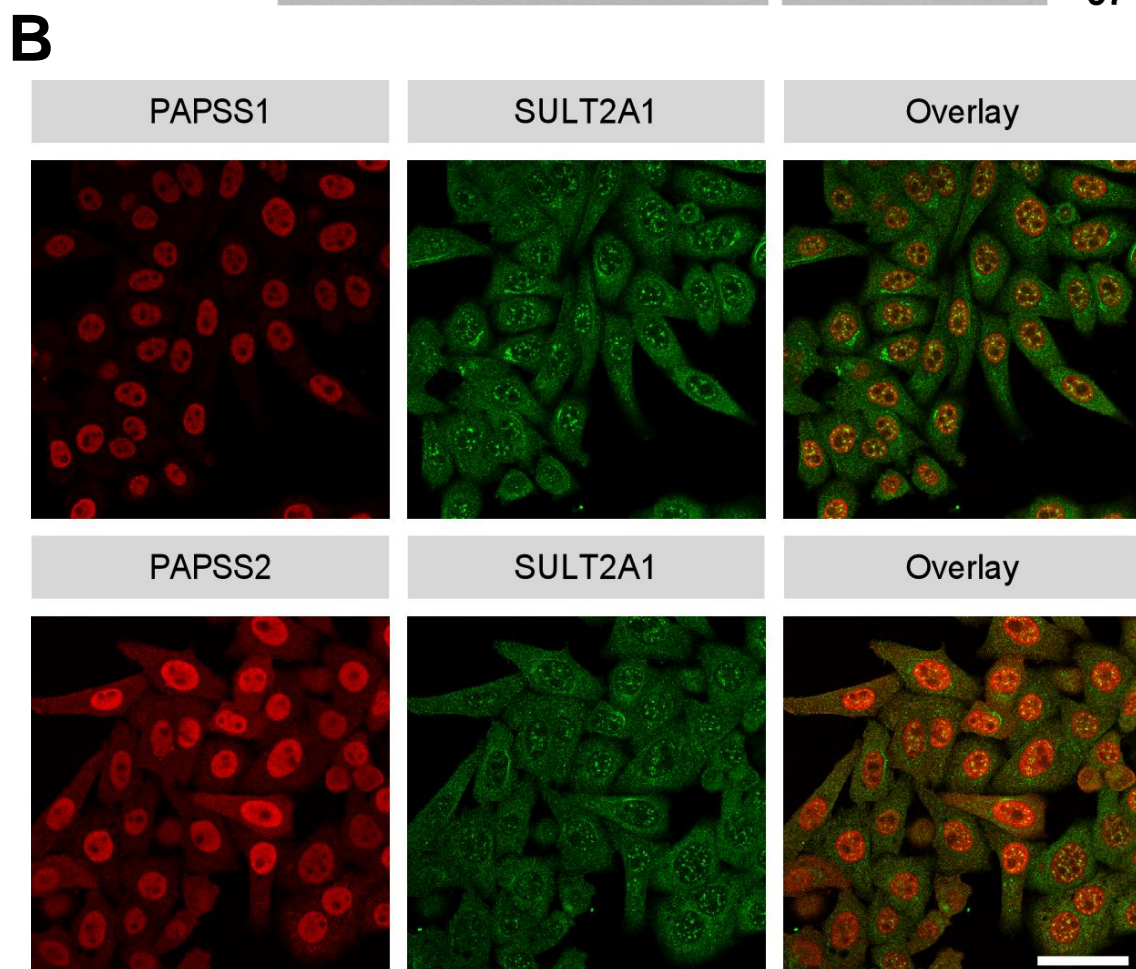

**Supporting Figure 1: GFP-trap-mediated PAPS synthase pull down and immuno-histochemical staining of sulfation pathway proteins**

**A**, EGFP-tagged PAPS synthases were over-expressed in NCI-H295R1 cells and pulled down from protein lysates using GFPtrap technology (Chromotek, Planegg-Martinsried, Germany). U, untreated; P1/P2, PAPS synthases 1/2; E, empty vector. Detection was with antibodies against EGFP,  $\beta$ -actin and human SULT2A1. A weak EGFP-PAPSS band is visible in the input, but very much more in the pull-down. Endogenous SULT2A1, clearly present in the input, does not co-elute together with PAPS synthases. **B**, mouse monoclonal antibodies for PAPSS1 or PAPSS2 were combined with a rabbit SULT2A1 polyclonal antibody for detection of endogenous proteins in a HepG2 cell line. Magnification, 600x.

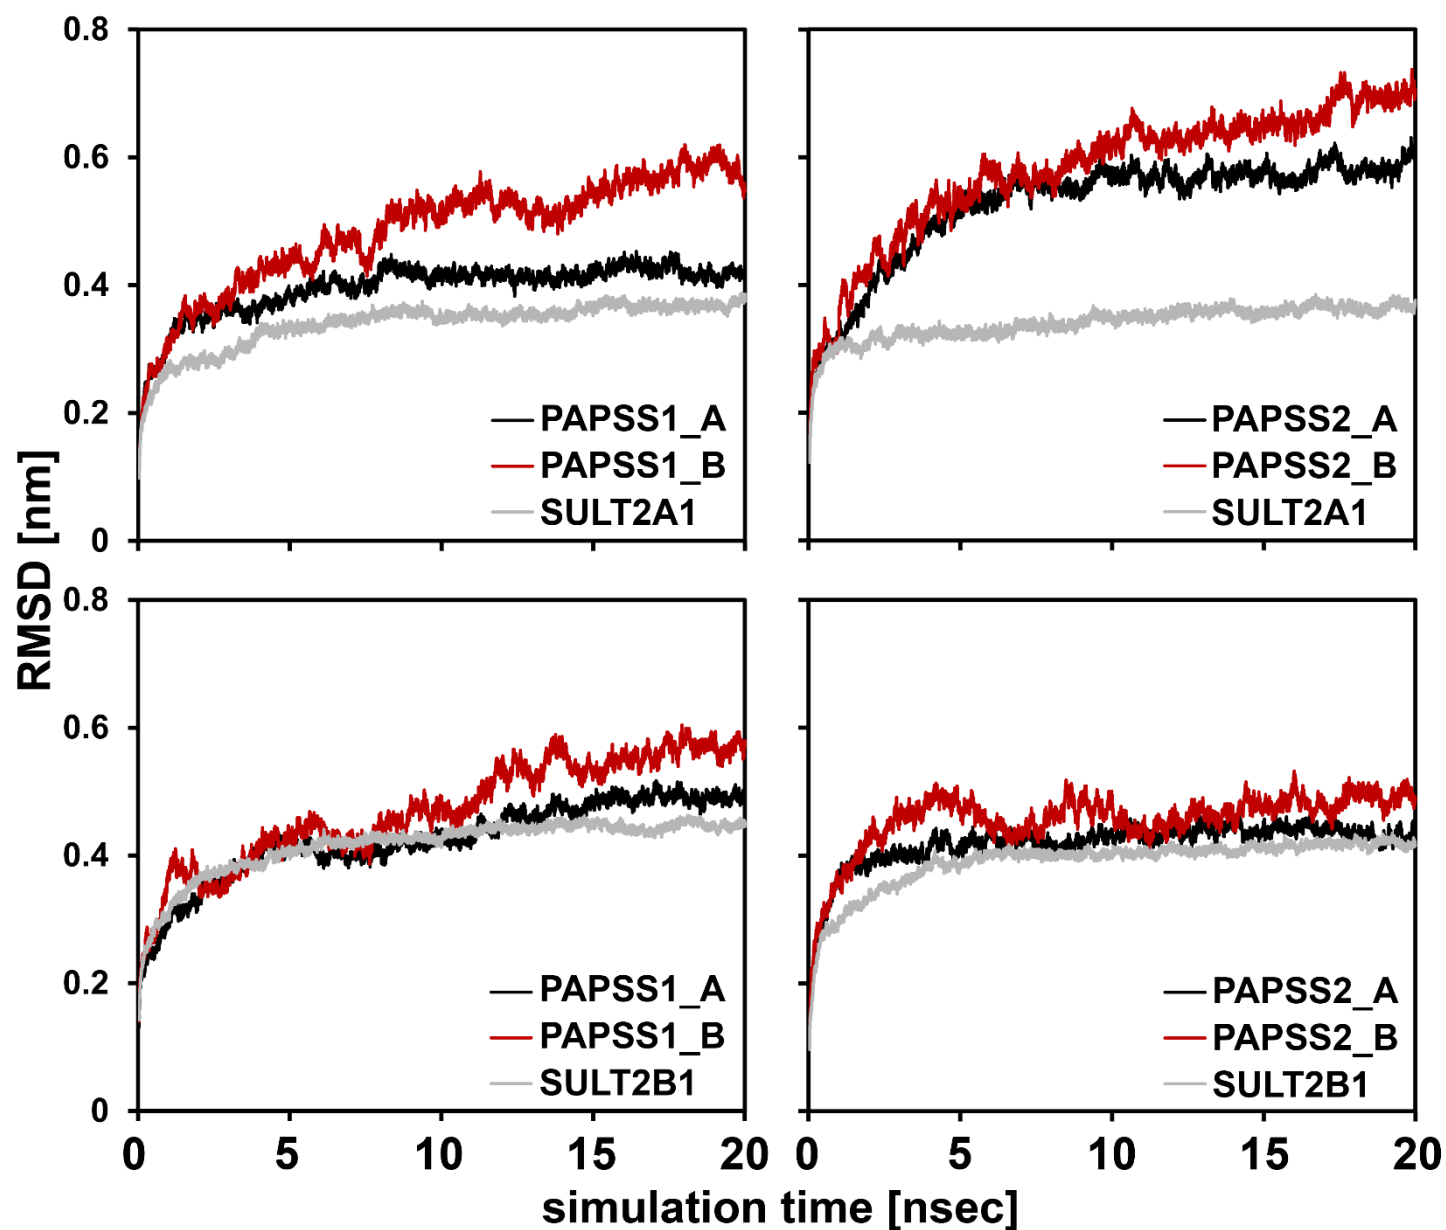

### Supporting Figure 2: RMSD traces for PAPS synthase-sulfotransferase MD simulations

Trajectories of three MD simulations were averaged as described (Liou et al, PLoS One 9, e94178) and plotted over 20 ns simulation time. Black, the PAPS synthase subunit “A” proximal to the sulfotransferase; red, the PAPS synthase subunit “B” more distant to the sulfotransferase; gray, the sulfotransferase. All four systems stabilized at a local RMSD minimum during simulation time (hence, MM-PBSA calculations are possible). Notably, the “B” subunit, the one not engaged in SULT binding, displays consistently higher RMSD values.

**Supporting Table 1: Real-time PCR data for NCI-H295R1 knockdown studies**

| $\Delta C_T \pm SD$                                     | siSULT2A1 (control)            | siPAPSS1 (control)             | siPAPSS2 (control)             |
|---------------------------------------------------------|--------------------------------|--------------------------------|--------------------------------|
| <i>SULT2A1</i>                                          | <b>15.84±0.87</b> (13.79±0.72) | <b>12.76±1.51</b> (12.90±1.60) | <b>13.08±0.48</b> (13.81±0.46) |
| <i>PAPSS1</i>                                           | <b>16.72±0.19</b> (16.58±0.22) | <b>17.27±1.63</b> (15.25±1.48) | <b>15.25±0.74</b> (16.07±0.68) |
| <i>PAPSS2</i>                                           | <b>15.10±0.54</b> (15.82±0.41) | <b>15.97±0.61</b> (15.43±0.44) | <b>17.56±0.43</b> (15.90±1.15) |
| At least five replicates were done for each measurement |                                |                                |                                |

**Supporting Table 2: DHEA conversion rates for PAPS synthase localization variants**

| PAPS synthase variant <sup>a</sup>                                                                                                                                                                                                                                             | DHEA conversion rate <sup>b</sup><br>[nmol DHEA/hour] | p-value <sup>c</sup><br>(relative to WT) |
|--------------------------------------------------------------------------------------------------------------------------------------------------------------------------------------------------------------------------------------------------------------------------------|-------------------------------------------------------|------------------------------------------|
| empty vector                                                                                                                                                                                                                                                                   | 2.03 ± 0.13                                           |                                          |
| PAPSS1 wild type                                                                                                                                                                                                                                                               | 13.87 ± 1.33                                          |                                          |
| PAPSS1 KK9,10AA                                                                                                                                                                                                                                                                | 8.51 ± 0.83                                           | < 0.05                                   |
| PAPSS1 RR111,112AA                                                                                                                                                                                                                                                             | 10.04 ± 0.67                                          | < 0.05                                   |
| PAPSS2 wild type                                                                                                                                                                                                                                                               | 29.1 ± 1.95                                           |                                          |
| PAPSS2 KK6,8AA                                                                                                                                                                                                                                                                 | 26.9 ± 1.29                                           | no difference to WT                      |
| PAPSS2 RR101,102AA                                                                                                                                                                                                                                                             | 22.56 ± 1.22                                          | < 0.01                                   |
| <sup>a</sup> each PAPSS variant was co-transfected with SULT2A1<br><sup>b</sup> all values expressed as the mean (± SEM) of triplicate assays from three independent experiments.<br><sup>c</sup> p value from post-hoc Bonferroni tests after one-way ANOVA (p-value < 0.001) |                                                       |                                          |

Supporting Table 3: PAPS synthase residues at the SULT2A1 interface

| PAPSS2    |     |       | SULT2A1<br>distance** | RMSF data for PAPS synthases |       |       |       | PAPSS1    |       |
|-----------|-----|-------|-----------------------|------------------------------|-------|-------|-------|-----------|-------|
| AA-<br>P2 | mol | no-P2 |                       | P2_A                         | P2_B  | P1_A  | P1_B  | AA-<br>P1 | no-P1 |
| SER*      | B   | 15    | dist<5                | 0.510                        | 0.492 | 0.347 | 0.508 | ALA       | 25    |
| THR       | B   | 16    | dist<7                | 0.397                        | 0.442 | 0.337 | 0.427 | THR       | 26    |
| ASN       | B   | 17    | dist<3                | 0.444                        | 0.414 | 0.290 | 0.419 | ASN       | 27    |
| VAL       | B   | 18    | dist<3                | 0.353                        | 0.338 | 0.233 | 0.299 | VAL       | 28    |
| VAL*      | B   | 19    | dist<5                | 0.360                        | 0.327 | 0.244 | 0.297 | THR       | 29    |
| TYR       | B   | 20    | dist<3                | 0.371                        | 0.302 | 0.238 | 0.306 | TYR       | 30    |
| GLN       | B   | 21    | dist<3                | 0.336                        | 0.302 | 0.233 | 0.254 | GLN       | 31    |
| ALA       | B   | 22    | dist<3                | 0.302                        | 0.276 | 0.214 | 0.239 | ALA       | 32    |
| HIS       | B   | 23    | dist<5                | 0.296                        | 0.272 | 0.197 | 0.238 | HIS       | 33    |
| HIS       | B   | 24    | dist<3                | 0.306                        | 0.264 | 0.231 | 0.219 | HIS       | 34    |
| VAL       | B   | 25    | dist<5                | 0.242                        | 0.233 | 0.176 | 0.169 | VAL       | 35    |
| SER       | B   | 26    | dist<5                | 0.245                        | 0.225 | 0.179 | 0.170 | SER       | 36    |
| ARG       | B   | 27    | dist<3                | 0.259                        | 0.220 | 0.195 | 0.214 | ARG       | 37    |
| ASN       | B   | 28    | dist<5                | 0.276                        | 0.244 | 0.226 | 0.206 | ASN       | 38    |
| LYS       | B   | 29    | dist<5                | 0.243                        | 0.248 | 0.229 | 0.193 | LYS       | 39    |
| ARG       | B   | 30    | dist<7                | 0.207                        | 0.210 | 0.160 | 0.146 | ARG       | 40    |
| GLY       | A   | 52    | dist<7                | 0.171                        | 0.256 | 0.155 | 0.198 | GLY       | 62    |
| ALA       | A   | 53    | dist<7                | 0.160                        | 0.260 | 0.165 | 0.221 | ALA       | 63    |
| GLY       | A   | 54    | dist<5                | 0.153                        | 0.252 | 0.145 | 0.201 | GLY       | 64    |
| LYS       | A   | 55    | dist<7                | 0.133                        | 0.214 | 0.114 | 0.183 | LYS       | 65    |
| THR       | A   | 56    | dist<5                | 0.148                        | 0.208 | 0.145 | 0.182 | THR       | 66    |
| THR       | A   | 57    | dist<3                | 0.155                        | 0.233 | 0.138 | 0.187 | THR       | 67    |
| ILE       | A   | 58    | dist<7                | 0.133                        | 0.209 | 0.107 | 0.167 | VAL       | 68    |
| PHE*      | A   | 60    | dist<5                | 0.164                        | 0.212 | 0.175 | 0.149 | MET       | 70    |
| ALA       | A   | 61    | dist<7                | 0.135                        | 0.194 | 0.096 | 0.147 | ALA       | 71    |
| GLU       | A   | 64    | dist<3                | 0.169                        | 0.219 | 0.119 | 0.164 | GLU       | 74    |
| TYR       | A   | 65    | dist<7                | 0.174                        | 0.230 | 0.107 | 0.182 | TYR       | 75    |
| ASP       | A   | 79    | dist<5                | 0.204                        | 0.243 | 0.135 | 0.165 | ASP       | 89    |
| ASN       | A   | 80    | dist<7                | 0.229                        | 0.235 | 0.139 | 0.158 | ASN       | 90    |
| VAL       | A   | 81    | dist<7                | 0.190                        | 0.213 | 0.130 | 0.179 | ILE       | 91    |
| ARG       | A   | 82    | dist<5                | 0.179                        | 0.250 | 0.148 | 0.202 | ARG       | 92    |
| HIS       | A   | 83    | dist<3                | 0.236                        | 0.280 | 0.189 | 0.206 | GLN       | 93    |
| GLY       | A   | 84    | dist<7                | 0.243                        | 0.260 | 0.153 | 0.187 | GLY       | 94    |
| ARG       | A   | 87    | dist<7                | 0.330                        | 0.333 | 0.220 | 0.242 | LYS       | 97    |
| ASP       | B   | 112   | dist<7                | 0.187                        | 0.187 | 0.138 | 0.160 | ASP       | 122   |
| SER       | B   | 138   | dist<7                | 0.250                        | 0.239 | 0.201 | 0.242 | GLY       | 148   |
| ALA       | B   | 139   | dist<7                | 0.223                        | 0.216 | 0.178 | 0.233 | ALA       | 149   |
| GLY       | B   | 140   | dist<7                | 0.215                        | 0.207 | 0.189 | 0.217 | SER       | 150   |
| SER       | A   | 157   | dist<7                | 0.306                        | 0.381 | 0.267 | 0.331 | GLN       | 167   |

|     |   |     |        |       |       |       |       |     |     |
|-----|---|-----|--------|-------|-------|-------|-------|-----|-----|
| ARG | A | 158 | dist<5 | 0.265 | 0.368 | 0.297 | 0.294 | ARG | 168 |
| ASP | A | 159 | dist<5 | 0.259 | 0.336 | 0.208 | 0.231 | ASP | 169 |
| VAL | A | 160 | dist<5 | 0.286 | 0.370 | 0.262 | 0.223 | VAL | 170 |
| LYS | A | 161 | dist<5 | 0.233 | 0.337 | 0.208 | 0.201 | LYS | 171 |
| GLY | A | 162 | dist<5 | 0.255 | 0.345 | 0.221 | 0.215 | GLY | 172 |
| LEU | A | 163 | dist<7 | 0.248 | 0.306 | 0.214 | 0.229 | LEU | 173 |
| LYS | A | 165 | dist<3 | 0.364 | 0.412 | 0.244 | 0.265 | LYS | 175 |
| ARG | A | 166 | dist<3 | 0.371 | 0.383 | 0.263 | 0.246 | LYS | 176 |
| ARG | A | 168 | dist<7 | 0.350 | 0.414 | 0.277 | 0.311 | ARG | 178 |
| GLU | A | 171 | dist<5 | 0.498 | 0.425 | 0.356 | 0.299 | GLU | 181 |
| ILE | A | 172 | dist<7 | 0.347 | 0.331 | 0.240 | 0.239 | ILE | 182 |
| THR | A | 198 | dist<7 | 0.227 | 0.302 | 0.205 | 0.266 | ASP | 208 |
| VAL | A | 199 | dist<5 | 0.197 | 0.263 | 0.199 | 0.231 | VAL | 209 |
| SER | A | 200 | dist<7 | 0.201 | 0.267 | 0.194 | 0.238 | ASN | 210 |
| ARG | A | 427 | dist<7 | 0.208 | 0.281 | 0.173 | 0.193 | LYS | 437 |
| ARG | A | 428 | dist<7 | 0.184 | 0.278 | 0.162 | 0.192 | GLN | 438 |
| LEU | A | 429 | dist<7 | 0.132 | 0.211 | 0.109 | 0.155 | LEU | 439 |
| LEU | A | 430 | dist<5 | 0.145 | 0.238 | 0.133 | 0.188 | LEU | 440 |
| GLU | A | 431 | dist<3 | 0.188 | 0.287 | 0.187 | 0.223 | GLU | 441 |
| ARG | A | 432 | dist<5 | 0.243 | 0.335 | 0.274 | 0.216 | ARG | 442 |
| GLY | A | 433 | dist<5 | 0.168 | 0.260 | 0.112 | 0.206 | GLY | 443 |
| TYR | A | 434 | dist<7 | 0.142 | 0.235 | 0.098 | 0.194 | TYR | 444 |

\*these residues were highlighted as decisive between PAPSS1- and PAPSS2-like sulfate activating complexes before (van den Boom et al, J Biol Chem 287, 17645-17655).

\*\*residues within 3, 5 or 7 Angstrom distance from SULT2A1 in an PAPSS2-SULT2A1 complex averaged over 15 ns simulation time

**Supporting Table 4: Isoelectric points of DHEA sulfation pathway proteins**

| Organism     | Enzyme  | Identifier* | pI   |
|--------------|---------|-------------|------|
| Homo sapiens | PAPSS1  | NM_005443   | 6.40 |
|              | PAPSS2  | NM_004670   | 8.18 |
|              | SULT2A1 | NM_003167   | 5.69 |
|              | SULT2B1 | NM_004605   | 6.10 |
|              | SULT1A1 | NM_001055   | 6.16 |
|              | SULT1B1 | NM_014465   | 6.57 |
|              | SULT1E1 | NM_005420   | 6.18 |

\*NCBI RefSeq numbers are given
